# Supplementary material for: The Optimal Cut-Off Point for Thai Diagnostic Autism Scale and Probability Prediction of Autism Spectrum Disorder Diagnosis in Suspected Children
Source: MDPI journal article supplement (doi:10.3390/healthcare10101868), 2022-09-25
Supplement: s1 [file s1]

**Table S1.** The predicted probability of ASD based on TDAS score and age.

| Age<br>(months) | TDAS<br>Score | Z      | Predicted<br>Probability | TDAS<br>Score | Z      | Predicted<br>Probability | TDAS<br>Score | Z     | Predicted<br>Probability |
|-----------------|---------------|--------|--------------------------|---------------|--------|--------------------------|---------------|-------|--------------------------|
| <b>12</b>       | <b>0</b>      | -4.525 | 0.011                    |               |        |                          |               |       |                          |
|                 | <b>1</b>      | -4.346 | 0.013                    | <b>21</b>     | -0.766 | 0.317                    | <b>41</b>     | 2.814 | 0.943                    |
|                 | <b>2</b>      | -4.167 | 0.015                    | <b>22</b>     | -0.587 | 0.357                    | <b>42</b>     | 2.993 | 0.952                    |
|                 | <b>3</b>      | -3.988 | 0.018                    | <b>23</b>     | -0.408 | 0.399                    | <b>43</b>     | 3.172 | 0.960                    |
|                 | <b>4</b>      | -3.809 | 0.022                    | <b>24</b>     | -0.229 | 0.443                    | <b>44</b>     | 3.351 | 0.966                    |
|                 | <b>5</b>      | -3.630 | 0.026                    | <b>25</b>     | -0.050 | 0.488                    | <b>45</b>     | 3.530 | 0.972                    |
|                 | <b>6</b>      | -3.451 | 0.031                    | <b>26</b>     | 0.129  | 0.532                    | <b>46</b>     | 3.709 | 0.976                    |
|                 | <b>7</b>      | -3.272 | 0.037                    | <b>27</b>     | 0.308  | 0.576                    | <b>47</b>     | 3.888 | 0.980                    |
|                 | <b>8</b>      | -3.093 | 0.043                    | <b>28</b>     | 0.487  | 0.619                    | <b>48</b>     | 4.067 | 0.983                    |
|                 | <b>9</b>      | -2.914 | 0.051                    | <b>29</b>     | 0.666  | 0.661                    | <b>49</b>     | 4.246 | 0.986                    |
|                 | <b>10</b>     | -2.735 | 0.061                    | <b>30</b>     | 0.845  | 0.700                    | <b>50</b>     | 4.425 | 0.988                    |
|                 | <b>11</b>     | -2.556 | 0.072                    | <b>31</b>     | 1.024  | 0.736                    | <b>51</b>     | 4.604 | 0.990                    |
|                 | <b>12</b>     | -2.377 | 0.085                    | <b>32</b>     | 1.203  | 0.769                    | <b>52</b>     | 4.783 | 0.992                    |
|                 | <b>13</b>     | -2.198 | 0.100                    | <b>33</b>     | 1.382  | 0.799                    | <b>53</b>     | 4.962 | 0.993                    |
|                 | <b>14</b>     | -2.019 | 0.117                    | <b>34</b>     | 1.561  | 0.826                    | <b>54</b>     | 5.141 | 0.994                    |
|                 | <b>15</b>     | -1.840 | 0.137                    | <b>35</b>     | 1.740  | 0.851                    | <b>55</b>     | 5.320 | 0.995                    |
|                 | <b>16</b>     | -1.661 | 0.160                    | <b>36</b>     | 1.919  | 0.872                    | <b>56</b>     | 5.499 | 0.996                    |
|                 | <b>17</b>     | -1.482 | 0.185                    | <b>37</b>     | 2.098  | 0.891                    | <b>57</b>     | 5.678 | 0.997                    |
|                 | <b>18</b>     | -1.303 | 0.214                    | <b>38</b>     | 2.277  | 0.907                    | <b>58</b>     | 5.857 | 0.997                    |
|                 | <b>19</b>     | -1.124 | 0.245                    | <b>39</b>     | 2.456  | 0.921                    | <b>59</b>     | 6.036 | 0.998                    |
|                 | <b>20</b>     | -0.945 | 0.280                    | <b>40</b>     | 2.635  | 0.933                    | <b>60</b>     | 6.215 | 0.998                    |
| <b>24</b>       | <b>0</b>      | -3.709 | 0.024                    |               |        |                          |               |       |                          |
|                 | <b>1</b>      | -3.530 | 0.028                    | <b>21</b>     | 0.050  | 0.512                    | <b>41</b>     | 3.630 | 0.974                    |
|                 | <b>2</b>      | -3.351 | 0.034                    | <b>22</b>     | 0.229  | 0.557                    | <b>42</b>     | 3.809 | 0.978                    |
|                 | <b>3</b>      | -3.172 | 0.040                    | <b>23</b>     | 0.408  | 0.601                    | <b>43</b>     | 3.988 | 0.982                    |
|                 | <b>4</b>      | -2.993 | 0.048                    | <b>24</b>     | 0.587  | 0.643                    | <b>44</b>     | 4.167 | 0.985                    |

| Age<br>(months) | TDAS<br>Score | Z      | Predicted<br>Probability | TDAS<br>Score | Z     | Predicted<br>Probability | TDAS<br>Score | Z     | Predicted<br>Probability |
|-----------------|---------------|--------|--------------------------|---------------|-------|--------------------------|---------------|-------|--------------------------|
|                 | 5             | -2.814 | 0.057                    | 25            | 0.766 | 0.683                    | 45            | 4.346 | 0.987                    |
|                 | 6             | -2.635 | 0.067                    | 26            | 0.945 | 0.720                    | 46            | 4.525 | 0.989                    |
|                 | 7             | -2.456 | 0.079                    | 27            | 1.124 | 0.755                    | 47            | 4.704 | 0.991                    |
|                 | 8             | -2.277 | 0.093                    | 28            | 1.303 | 0.786                    | 48            | 4.883 | 0.992                    |
|                 | 9             | -2.098 | 0.109                    | 29            | 1.482 | 0.815                    | 49            | 5.062 | 0.994                    |
|                 | 10            | -1.919 | 0.128                    | 30            | 1.661 | 0.840                    | 50            | 5.241 | 0.995                    |
|                 | 11            | -1.740 | 0.149                    | 31            | 1.840 | 0.863                    | 51            | 5.420 | 0.996                    |
|                 | 12            | -1.561 | 0.174                    | 32            | 2.019 | 0.883                    | 52            | 5.599 | 0.996                    |
|                 | 13            | -1.382 | 0.201                    | 33            | 2.198 | 0.900                    | 53            | 5.778 | 0.997                    |
|                 | 14            | -1.203 | 0.231                    | 34            | 2.377 | 0.915                    | 54            | 5.957 | 0.997                    |
|                 | 15            | -1.024 | 0.264                    | 35            | 2.556 | 0.928                    | 55            | 6.136 | 0.998                    |
|                 | 16            | -0.845 | 0.300                    | 36            | 2.735 | 0.939                    | 56            | 6.315 | 0.998                    |
|                 | 17            | -0.666 | 0.339                    | 37            | 2.914 | 0.949                    | 57            | 6.494 | 0.998                    |
|                 | 18            | -0.487 | 0.381                    | 38            | 3.093 | 0.957                    | 58            | 6.673 | 0.999                    |
|                 | 19            | -0.308 | 0.424                    | 39            | 3.272 | 0.963                    | 59            | 6.852 | 0.999                    |
|                 | 20            | -0.129 | 0.468                    | 40            | 3.451 | 0.969                    | 60            | 7.031 | 0.999                    |
| 36              | 0             | -2.893 | 0.053                    |               |       |                          |               |       |                          |
|                 | 1             | -2.714 | 0.062                    | 21            | 0.866 | 0.704                    | 41            | 4.446 | 0.988                    |
|                 | 2             | -2.535 | 0.073                    | 22            | 1.045 | 0.740                    | 42            | 4.625 | 0.990                    |
|                 | 3             | -2.356 | 0.087                    | 23            | 1.224 | 0.773                    | 43            | 4.804 | 0.992                    |
|                 | 4             | -2.177 | 0.102                    | 24            | 1.403 | 0.803                    | 44            | 4.983 | 0.993                    |
|                 | 5             | -1.998 | 0.119                    | 25            | 1.582 | 0.829                    | 45            | 5.162 | 0.994                    |
|                 | 6             | -1.819 | 0.140                    | 26            | 1.761 | 0.853                    | 46            | 5.341 | 0.995                    |
|                 | 7             | -1.640 | 0.162                    | 27            | 1.940 | 0.874                    | 47            | 5.520 | 0.996                    |
|                 | 8             | -1.461 | 0.188                    | 28            | 2.119 | 0.893                    | 48            | 5.699 | 0.997                    |
|                 | 9             | -1.282 | 0.217                    | 29            | 2.298 | 0.909                    | 49            | 5.878 | 0.997                    |
|                 | 10            | -1.103 | 0.249                    | 30            | 2.477 | 0.923                    | 50            | 6.057 | 0.998                    |
|                 | 11            | -0.924 | 0.284                    | 31            | 2.656 | 0.934                    | 51            | 6.236 | 0.998                    |

| Age<br>(months) | TDAS<br>Score | Z      | Predicted<br>Probability | TDAS<br>Score | Z     | Predicted<br>Probability | TDAS<br>Score | Z     | Predicted<br>Probability |
|-----------------|---------------|--------|--------------------------|---------------|-------|--------------------------|---------------|-------|--------------------------|
|                 | 12            | -0.745 | 0.322                    | 32            | 2.835 | 0.945                    | 52            | 6.415 | 0.998                    |
|                 | 13            | -0.566 | 0.362                    | 33            | 3.014 | 0.953                    | 53            | 6.594 | 0.999                    |
|                 | 14            | -0.387 | 0.404                    | 34            | 3.193 | 0.961                    | 54            | 6.773 | 0.999                    |
|                 | 15            | -0.208 | 0.448                    | 35            | 3.372 | 0.967                    | 55            | 6.952 | 0.999                    |
|                 | 16            | -0.029 | 0.493                    | 36            | 3.551 | 0.972                    | 56            | 7.131 | 0.999                    |
|                 | 17            | 0.150  | 0.537                    | 37            | 3.730 | 0.977                    | 57            | 7.310 | 0.999                    |
|                 | 18            | 0.329  | 0.582                    | 38            | 3.909 | 0.980                    | 58            | 7.489 | 0.999                    |
|                 | 19            | 0.508  | 0.624                    | 39            | 4.088 | 0.984                    | 59            | 7.668 | 1.000                    |
|                 | 20            | 0.687  | 0.665                    | 40            | 4.267 | 0.986                    | 60            | 7.847 | 1.000                    |
|                 |               |        |                          |               |       |                          |               |       |                          |
| 48              | 0             | -2.077 | 0.111                    |               |       |                          |               |       |                          |
|                 | 1             | -1.898 | 0.130                    | 21            | 1.682 | 0.843                    | 41            | 5.262 | 0.995                    |
|                 | 2             | -1.719 | 0.152                    | 22            | 1.861 | 0.865                    | 42            | 5.441 | 0.996                    |
|                 | 3             | -1.540 | 0.177                    | 23            | 2.040 | 0.885                    | 43            | 5.620 | 0.996                    |
|                 | 4             | -1.361 | 0.204                    | 24            | 2.219 | 0.902                    | 44            | 5.799 | 0.997                    |
|                 | 5             | -1.182 | 0.235                    | 25            | 2.398 | 0.917                    | 45            | 5.978 | 0.997                    |
|                 | 6             | -1.003 | 0.268                    | 26            | 2.577 | 0.929                    | 46            | 6.157 | 0.998                    |
|                 | 7             | -0.824 | 0.305                    | 27            | 2.756 | 0.940                    | 47            | 6.336 | 0.998                    |
|                 | 8             | -0.645 | 0.344                    | 28            | 2.935 | 0.950                    | 48            | 6.515 | 0.999                    |
|                 | 9             | -0.466 | 0.386                    | 29            | 3.114 | 0.957                    | 49            | 6.694 | 0.999                    |
|                 | 10            | -0.287 | 0.429                    | 30            | 3.293 | 0.964                    | 50            | 6.873 | 0.999                    |
|                 | 11            | -0.108 | 0.473                    | 31            | 3.472 | 0.970                    | 51            | 7.052 | 0.999                    |
|                 | 12            | 0.071  | 0.518                    | 32            | 3.651 | 0.975                    | 52            | 7.231 | 0.999                    |
|                 | 13            | 0.250  | 0.562                    | 33            | 3.830 | 0.979                    | 53            | 7.410 | 0.999                    |
|                 | 14            | 0.429  | 0.606                    | 34            | 4.009 | 0.982                    | 54            | 7.589 | 0.999                    |
|                 | 15            | 0.608  | 0.647                    | 35            | 4.188 | 0.985                    | 55            | 7.768 | 1.000                    |
|                 | 16            | 0.787  | 0.687                    | 36            | 4.367 | 0.987                    | 56            | 7.947 | 1.000                    |
|                 | 17            | 0.966  | 0.724                    | 37            | 4.546 | 0.990                    | 57            | 8.126 | 1.000                    |
|                 | 18            | 1.145  | 0.759                    | 38            | 4.725 | 0.991                    | 58            | 8.305 | 1.000                    |

| Age<br>(months) | TDAS<br>Score | Z     | Predicted<br>Probability | TDAS<br>Score | Z     | Predicted<br>Probability | TDAS<br>Score | Z     | Predicted<br>Probability |
|-----------------|---------------|-------|--------------------------|---------------|-------|--------------------------|---------------|-------|--------------------------|
|                 | 19            | 1.324 | 0.790                    | 39            | 4.904 | 0.993                    | 59            | 8.484 | 1.000                    |
|                 | 20            | 1.503 | 0.818                    | 40            | 5.083 | 0.994                    | 60            | 8.663 | 1.000                    |

$$Z = -5.341 + 0.179(\text{TDAS}) + 0.068(\text{Age})$$

The formula to predict the probability of ASD based to these variables is defined as follows:

$$\text{Pr(ASD)} = e^z / (1 + e^z) = e^{-5.341 + 0.179(\text{TDAS}) + 0.068(\text{Age})} / (1 + e^{-5.341 + 0.179(\text{TDAS}) + 0.068(\text{Age})}),$$

where Pr(ASD) is the probability of ASD, TDAS is the TDAS score (ranged from 0–60), and Age is the age of the child suspected of having ASD (months).
